# Supplementary material for: N-Butyrylated Hyaluronic Acid Achieves Anti-Inflammatory Effects In Vitro and in Adjuvant-Induced Immune Activation in Rats
Source: MDPI journal article supplement (doi:10.3390/molecules27103267), 2022-05-19
Supplement: s1 [file s1]

## Supplementary information

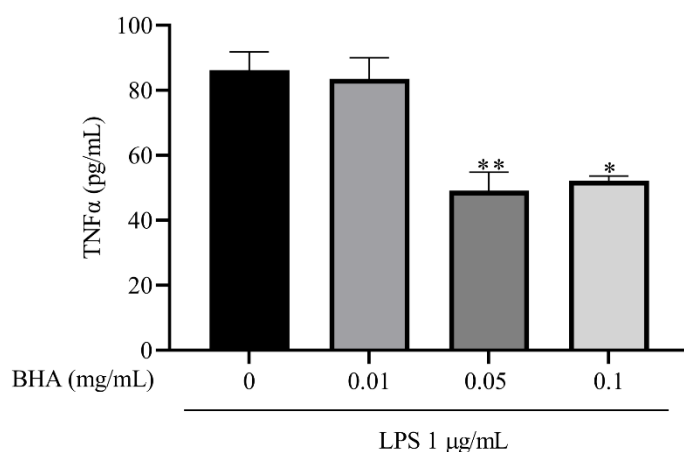

**Figure S1.** Effects of BHA on the expression of TNF $\alpha$  in LPS-induced RAW264.7 macrophage cells. Cells were pre-treated with various concentrations of BHA for 6 h and stimulated with 1  $\mu$ g/mL of LPS for 12 h. Supernatants were collected after LPS stimulation and the protein level of TNF $\alpha$  was quantified by corresponding ELISA kits. Data are presented as the mean  $\pm$  SEM of three independent experiments. One-way ANOVA was used to compare the results between each group. \* $p < 0.05$ , \*\* $p < 0.01$ .

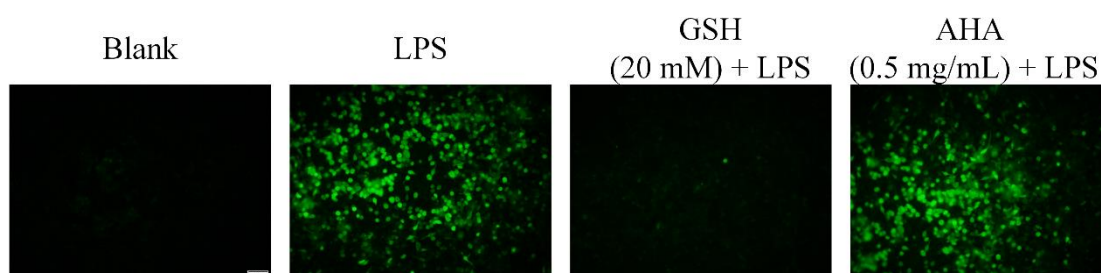

**Figure S2.** Effects of AHA on the ROS level in LPS-induced RAW264.7 macrophages. Cells were treated with AHA for 12 h in the presence or absence of LPS (1  $\mu$ g/mL) for 12 h. GSH was used as a control. The generation of ROS was measured and confirmed via DCFH-DA assays.
